# Supplementary material for: Transcriptome Analyses Indicate Significant Association of Increased Non-Additive and Allele-Specific Gene Expression with Hybrid Weakness in Rice (Oryza sativa L.)
Source: MDPI journal article supplement (doi:10.3390/life12081278), 2022-08-21
Supplement: s1 [file s1]

# Supplementary Tables

**Table S1. GYPP field performance of parental lines and hybrids.**

**Table S2. Statistics of RNA sequencing data.**

**Table S3. The mapping rate of RNA-seq reads (mapped by using HISAT2).**

**Table S4. Statistics of DNA sequencing data.**

**Table S5. The mapping rate of whole genome sequencing reads (mapped by using BWA MEM).**

**Table S6. The coverage of whole genome sequencing reads (mapped by using BWA MEM).**

**Table S7. Markers with different homozygous genotypes between two parents.**

**Table S1. GYPP field performance of parental lines and hybrids.**

|                              | GYPP (2016FJ) |       |       | GYPP (2016HN) |       |       | GYPP (2017HN) |       |       | GYPP (2019HN) |       |       |
|------------------------------|---------------|-------|-------|---------------|-------|-------|---------------|-------|-------|---------------|-------|-------|
|                              | rep1          | rep2  | rep3  |
| <b>P1 (MH86)</b>             | 39.59         | 42.11 | 37.00 | 28.30         | 26.00 | 19.72 | 21.52         | 38.22 | 37.81 | 39.57         | 41.41 | 39.04 |
| <b>P2 (Gui99)</b>            | 33.40         | 34.72 | 32.92 | 26.94         | 18.55 | 20.43 | 23.03         | 32.76 | 31.95 | 32.42         | 25.86 | 34.79 |
| <b>P3 (FH7018)</b>           | 37.22         | 31.95 | 42.96 | 31.45         | 29.07 | 26.09 | 20.64         | 28.05 | 28.87 | 45.73         | 28.09 | 29.22 |
| <b>M1 (Ⅱ-32 A/B)</b>         | 33.69         | 42.28 | 32.18 | 32.67         | 22.70 | 24.15 | 22.66         | 28.51 | 33.07 | 40.91         | 40.73 | 33.03 |
| <b>M2 (TaiFeng A/B)</b>      | 32.25         | 26.67 | 36.09 | 32.19         | 20.86 | 22.40 | 24.21         | 30.53 | 36.63 | 44.90         | 45.50 | 41.76 |
| <b>M3 (TianFeng A/B)</b>     | 27.39         | 41.32 | 29.95 | 26.05         | 20.22 | 21.14 | 23.77         | 33.94 | 39.84 | 35.41         | 41.54 | 44.30 |
| <b>H1 (Ⅱ-32A/MH86)</b>       | 28.60         | 35.91 | 39.80 | 36.68         | 23.85 | 31.37 | 33.82         | 47.20 | 45.29 | 58.58         | 58.67 | 54.72 |
| <b>H4 (Ⅱ-32A/Gui99)</b>      | 40.04         | 50.25 | 44.89 | 35.30         | 30.25 | 23.47 | 38.19         | 51.03 | 48.76 | 50.29         | 42.24 | 43.71 |
| <b>H7 (Ⅱ-32A/FH7018)</b>     | 44.40         | 48.19 | 56.34 | 31.17         | 32.37 | 40.09 | 28.86         | 50.79 | 44.64 | 54.12         | 62.22 | 45.54 |
| <b>H2 (TaiFengA/MH86)</b>    | 34.65         | 45.27 | 48.39 | 24.14         | 16.98 | 24.81 | 44.38         | 29.51 | 33.18 | 45.05         | 56.96 | 55.29 |
| <b>H5 (TaiFengA/Gui99)</b>   | 39.34         | 38.20 | 47.06 | 19.97         | 21.15 | 24.04 | 32.36         | 26.35 | 20.64 | 41.50         | 39.97 | 40.66 |
| <b>H8 (TaiFengA/FH7018)</b>  | 45.87         | 48.67 | 58.30 | 27.02         | 19.92 | 26.44 | 46.83         | 30.75 | 32.19 | 60.31         | 40.66 | 45.42 |
| <b>H3 (TianFengA/MH86)</b>   | 40.86         | 42.49 | 47.04 | 27.24         | 35.56 | 32.32 | 46.15         | 44.56 | 39.30 | 45.82         | 49.82 | 50.02 |
| <b>H6 (TianFengA/Gui99)</b>  | 39.70         | 42.68 | 53.14 | 25.01         | 24.45 | 29.16 | 30.58         | 40.14 | 36.07 | 36.86         | 41.07 | 34.52 |
| <b>H9 (TianFengA/FH7018)</b> | 40.86         | 47.10 | 56.06 | 39.50         |       | 25.60 | 50.80         | 52.98 | 40.05 | 56.11         | 63.13 | 68.78 |

**Table S2. Statistics of RNA sequencing data.**

| Sample           | Raw Base(G) | Clean Base(G) | Rate(%) | Q20(%) | Q30(%) | GC (%) |
|------------------|-------------|---------------|---------|--------|--------|--------|
| MH86-1           | 6.58        | 6.5           | 98.83   | 96.6   | 91.67  | 51.94  |
| MH86-2           | 7.02        | 6.97          | 99.25   | 96.02  | 90.35  | 52.72  |
| MH86-3           | 8.41        | 8.34          | 99.09   | 95.66  | 89.7   | 53.59  |
| Gui99-1          | 6.52        | 6.47          | 99.21   | 96.03  | 90.53  | 51.7   |
| Gui99-2          | 7.21        | 7.16          | 99.29   | 96.4   | 91.35  | 51.42  |
| Gui99-3          | 7.26        | 7.2           | 99.16   | 96.19  | 90.88  | 51.38  |
| FH7018-1         | 7.6         | 7.47          | 98.39   | 96.76  | 91.97  | 52.18  |
| FH7018-2         | 6.74        | 6.63          | 98.27   | 97.5   | 93.56  | 52.1   |
| FH7018-3         | 8.13        | 8.02          | 98.66   | 95.96  | 90.47  | 52.37  |
| II-32B-1         | 7.8         | 7.72          | 99      | 96.02  | 90.56  | 53.11  |
| II-32B-2         | 8.31        | 8.2           | 98.64   | 96.35  | 91.2   | 53.02  |
| II-32B-3         | 8.46        | 8.36          | 98.9    | 94.96  | 88.63  | 52.14  |
| TaiFenB-1        | 7.44        | 7.37          | 98.99   | 95.06  | 88.65  | 51.73  |
| TaiFenB-2        | 6.93        | 6.87          | 99.07   | 95.16  | 88.84  | 51.2   |
| TaiFenB-3        | 6.59        | 6.52          | 98.96   | 93.79  | 85.88  | 52.52  |
| TianFenB-1       | 7.51        | 7.38          | 98.29   | 96.03  | 90.6   | 51.41  |
| TianFenB-2       | 7.44        | 7.36          | 98.93   | 95.85  | 90.23  | 52.72  |
| TianFenB-3       | 7.56        | 7.49          | 99.13   | 95.95  | 90.42  | 52.22  |
| II-32AxMH86-1    | 8.15        | 8.09          | 99.26   | 95.84  | 90.2   | 51.89  |
| II-32AxMH86-2    | 7.26        | 7.2           | 99.24   | 95.94  | 90.4   | 51.73  |
| II-32AxMH86-3    | 6.79        | 6.74          | 99.23   | 95.81  | 90.16  | 52.31  |
| II-32AxGui99-1   | 8.35        | 8.26          | 99.02   | 95.31  | 89.14  | 51.69  |
| II-32AxGui99-2   | 7.34        | 7.26          | 98.94   | 95     | 88.53  | 52.03  |
| II-32AxGui99-3   | 7.38        | 7.32          | 99.15   | 93.91  | 86.1   | 52.01  |
| II-32AxFH7018-1  | 7.12        | 7.06          | 99.15   | 94.28  | 86.73  | 52     |
| II-32AxFH7018-2  | 6.8         | 6.74          | 99.21   | 94.05  | 86.3   | 51.46  |
| II-32AxFH7018-3  | 6.92        | 6.86          | 99.03   | 95.22  | 88.94  | 51.98  |
| TaiFenAxMH86-1   | 8.21        | 8.11          | 98.77   | 96.11  | 90.77  | 51.55  |
| TaiFenAxMH86-2   | 7.67        | 7.57          | 98.79   | 95.94  | 90.4   | 51.95  |
| TaiFenAxMH86-3   | 7.46        | 7.34          | 98.4    | 94.84  | 88.02  | 52.32  |
| TaiFenAxGui99-1  | 8.16        | 8.07          | 98.92   | 94.98  | 88.11  | 51.84  |
| TaiFenAxGui99-2  | 7.5         | 7.43          | 99.07   | 94.87  | 88.07  | 52.39  |
| TaiFenAxGui99-3  | 8.53        | 8.46          | 99.17   | 94.9   | 88.12  | 52.26  |
| TaiFenAxFH7018-1 | 7.53        | 7.46          | 99.1    | 94.85  | 88     | 51.97  |
| TaiFenAxFH7018-2 | 7.78        | 7.71          | 99.22   | 94.39  | 87.04  | 52.03  |
| TaiFenAxFH7018-3 | 8           | 7.92          | 98.95   | 94.5   | 87.15  | 52.17  |
| TianFenAxMH86-1  | 9.64        | 9.45          | 98.07   | 94.81  | 87.75  | 52.85  |
| TianFenAxMH86-2  | 9.47        | 9.35          | 98.8    | 94.66  | 87.49  | 51.97  |
| TianFenAxMH86-3  | 8.58        | 8.47          | 98.67   | 94.83  | 87.98  | 53.06  |
| TianFenAxGui99-1 | 8.88        | 8.8           | 99.15   | 94.36  | 87.17  | 52.46  |
| TianFenAxGui99-2 | 7.43        | 7.36          | 99.09   | 94.85  | 88.27  | 51.96  |
| TianFenAxGui99-3 | 7.54        | 7.41          | 98.28   | 94.42  | 87.24  | 52.72  |

| Sample            | Raw Base(G) | Clean Base(G) | Rate(%) | Q20(%) | Q30(%) | GC (%) |
|-------------------|-------------|---------------|---------|--------|--------|--------|
| TianFenAxFH7018-1 | 8.82        | 8.73          | 99.05   | 94.56  | 87.55  | 52.12  |
| TianFenAxFH7018-2 | 9.27        | 9.18          | 99.1    | 93.46  | 85.41  | 52.12  |
| TianFenAxFH7018-3 | 7.17        | 7.09          | 98.94   | 94.88  | 88.4   | 52.02  |

Note: Q20 and Q30, the phred value was higher than 20 and 30; Phred= $-10\log_{10}(e)$ ; Rate (%), the ratio of clean base and raw base.

**Table S3. The mapping rate of RNA-seq reads (mapped by using HISAT2).**

| Sample            | Total reads   | Mapped<br>reads | rate (%) |
|-------------------|---------------|-----------------|----------|
| FH7018-1          | 49,836,078    | 49,096,023      | 98.52%   |
| FH7018-2          | 44,173,486    | 43,485,161      | 98.44%   |
| FH7018-3          | 53,453,162    | 52,650,246      | 98.50%   |
| Gui99-1           | 43,111,776    | 42,516,998      | 98.62%   |
| Gui99-2           | 47,717,230.00 | 47,018,019.00   | 98.54%   |
| Gui99-3           | 47,973,438    | 47,074,981      | 98.13%   |
| II32AxFH7018-1    | 55,096,612    | 54,351,201      | 98.65%   |
| II32AxFH7018-2    | 48,429,876    | 47,723,713      | 98.54%   |
| II32AxFH7018-3    | 48,814,234    | 48,101,296      | 98.54%   |
| II32AxGui99-1     | 47,048,128    | 46,263,902      | 98.33%   |
| II32AxGui99-2     | 44,943,738    | 44,200,758      | 98.35%   |
| II32AxGui99-3     | 45,718,144    | 45,150,273      | 98.76%   |
| II32AxMH86-1      | 53,922,238    | 53,257,241      | 98.77%   |
| II32AxMH86-2      | 48,020,660    | 47,482,406      | 98.88%   |
| II32AxMH86-3      | 44,950,238    | 44,392,361      | 98.76%   |
| II32B-1           | 51,471,052    | 50,745,084      | 98.59%   |
| II32B-2           | 54,650,672    | 53,990,607      | 98.79%   |
| II32B-3           | 55,760,296    | 54,914,767      | 98.48%   |
| MH86-1            | 43,353,354    | 42,480,610      | 97.99%   |
| MH86-2            | 46,455,288    | 45,899,573      | 98.80%   |
| MH86-3            | 55,593,602    | 54,800,349      | 98.57%   |
| TaiFenAxFH7018-1  | 49,715,800    | 49,080,363      | 98.72%   |
| TaiFenAxFH7018-2  | 51,430,950    | 50,401,476      | 98.00%   |
| TaiFenAxFH7018-3  | 52,765,974    | 51,988,446      | 98.53%   |
| TaiFenAxGui99-1   | 53,792,208    | 53,017,331      | 98.56%   |
| TaiFenAxGui99-2   | 49,505,602    | 48,789,235      | 98.55%   |
| TaiFenAxGui99-3   | 56,405,592    | 55,648,992      | 98.66%   |
| TaiFenAxMH86-1    | 54,088,922    | 53,480,665      | 98.88%   |
| TaiFenAxMH86-2    | 50,487,428    | 49,936,008      | 98.91%   |
| TaiFenAxMH86-3    | 48,951,012    | 48,334,284      | 98.74%   |
| TaiFenB-1         | 49,122,822    | 48,052,593      | 97.82%   |
| TaiFenB-2         | 45,777,272    | 44,988,362      | 98.28%   |
| TaiFenB-3         | 43,475,540    | 42,489,977      | 97.73%   |
| TianFenAxFH7018-1 | 58,228,208    | 57,430,536      | 98.63%   |
| TianFenAxFH7018-2 | 61,227,666    | 60,176,333      | 98.28%   |
| TianFenAxFH7018-3 | 47,262,072    | 46,577,989      | 98.55%   |
| TianFenAxGui99-1  | 58,672,368    | 57,706,008      | 98.35%   |
| TianFenAxGui99-2  | 49,054,130    | 48,366,386      | 98.60%   |
| TianFenAxGui99-3  | 49,377,016    | 48,639,125      | 98.51%   |
| TianFenAxMH86-1   | 63,023,262    | 60,783,817      | 96.45%   |
| TianFenAxMH86-2   | 62,353,396    | 61,541,678      | 98.70%   |

| Sample          | Total reads | Mapped<br>reads | rate (%) |
|-----------------|-------------|-----------------|----------|
| TianFenAxMH86-3 | 56,440,648  | 55,701,047      | 98.69%   |
| TianFenB-1      | 49,187,696  | 48,247,036      | 98.09%   |
| TianFenB-2      | 49,084,330  | 48,484,168      | 98.78%   |
| TianFenB-3      | 49,955,592  | 49,320,105      | 98.73%   |

**Table S4. Statistics of DNA sequencing data.**

| Sample    | Raw data |            | Trimmed data |          |            |          |
|-----------|----------|------------|--------------|----------|------------|----------|
|           | Base (G) | Number     | Base (G)     | Rate (%) | Number     | Rate (%) |
| FH7018    | 9.29     | 61,929,546 | 8.27         | 88.98    | 58,651,934 | 94.71    |
| Gui99     | 9.69     | 64,602,266 | 8.49         | 87.64    | 60,649,882 | 93.88    |
| MH86      | 8.86     | 59,083,850 | 7.82         | 88.21    | 55,577,580 | 94.07    |
| II-32B    | 11.48    | 76,547,008 | 9.56         | 83.36    | 70,444,934 | 92.16    |
| TaiFengB  | 9.66     | 64,415,534 | 8.41         | 87.05    | 60,402,274 | 93.77    |
| TianFengB | 10.05    | 67,031,984 | 8.82         | 87.72    | 62,933,684 | 93.89    |

**Table S5. The mapping rate of whole genome sequencing reads (mapped by using BWA MEM).**

| Sample    | Total reads | Duplicated | Mapped   |            |          |
|-----------|-------------|------------|----------|------------|----------|
|           |             | reads      | rate (%) | reads      | rate (%) |
| FH7018    | 58,651,934  | 4,992,796  | 8.513    | 56,878,867 | 96.977   |
| Gui99     | 60,649,882  | 5,710,194  | 9.415    | 58,728,356 | 96.832   |
| MH86      | 55,577,580  | 5,252,186  | 9.45     | 53,912,459 | 97.004   |
| II32B     | 70,444,934  | 6,985,466  | 9.916    | 66,400,012 | 94.258   |
| TaiFengB  | 60,402,274  | 6,265,576  | 10.373   | 58,030,052 | 96.073   |
| TianFengB | 62,933,684  | 5,568,678  | 8.848    | 60,786,833 | 96.589   |



**Table S6. The coverage of whole genome sequencing reads (mapped by using BWA MEM).**

| Sample   | Avg. depth | 1x coverage | 5x coverage | 7x coverage | 10x coverage |
|----------|------------|-------------|-------------|-------------|--------------|
| FH7018   | 20.63      | 91.89%      | 86.73%      | 84.80%      | 81.13%       |
| Gui99    | 21.64      | 92.34%      | 87.59%      | 85.88%      | 82.90%       |
| MH86     | 19.92      | 92.97%      | 87.76%      | 85.69%      | 81.59%       |
| II32B    | 23.58      | 92.68%      | 87.80%      | 86.14%      | 83.50%       |
| TaiFenB  | 20.99      | 92.11%      | 87.12%      | 85.27%      | 81.83%       |
| TianFenB | 22.19      | 91.93%      | 86.94%      | 85.17%      | 82.18%       |

**Table S7. Markers with different homozygous genotypes between two parents.**

| Cross combination       | SNP number | SNP density | Ts/Tv ratio | InDel number | InDel density |
|-------------------------|------------|-------------|-------------|--------------|---------------|
| <b>II32BxFH7018</b>     | 943,338    | 2.52        | 2.41        | 117,179      | 0.31          |
| <b>II32BxGui99</b>      | 874,370    | 2.34        | 2.4         | 110,325      | 0.30          |
| <b>II32BxMH86</b>       | 839,616    | 2.24        | 2.42        | 105,173      | 0.28          |
| <b>TaiFengBxFH7018</b>  | 781,553    | 2.09        | 2.4         | 96,732       | 0.26          |
| <b>TaiFengBxGui99</b>   | 797,956    | 2.13        | 2.4         | 99,207       | 0.27          |
| <b>TaiFengBxMH86</b>    | 663,652    | 1.77        | 2.4         | 82,680       | 0.22          |
| <b>TianFengBxFH7018</b> | 895,006    | 2.39        | 2.42        | 109,472      | 0.29          |
| <b>TianFengBxGui99</b>  | 821,409    | 2.20        | 2.39        | 103,685      | 0.28          |
| <b>TianFengBxMH86</b>   | 756,045    | 2.02        | 2.4         | 95,019       | 0.25          |

Note: Density mean number of SNP or InDel markers per kb. Cross: Maternal parent x paternal parent.
